# Supplementary material for: Total synthesis of the proposed structures of the DNA methyl transferase inhibitors peyssonenynes, and structural revision of peyssonenyne B
Source: Royal Society of Chemistry journal article supplement (doi:10.1039/c1ob05932g), 2011-01-01

# **Total synthesis of the proposed structures of the natural DNA methyl transferase (DNMT) inhibitors peyssonenynes, and structural revision of peyssonenyne B**

Patricia García,<sup>a</sup> Ilaria Lepore,<sup>b,c</sup> Cathie Erb,<sup>d</sup> Hinrich Gronemeyer,<sup>d</sup> Lucia Altucci,<sup>b,c</sup>  
Rosana Alvarez,<sup>a\*</sup> and Ángel R. de Lera<sup>a\*</sup>

<sup>a</sup>Departamento de Química Orgánica, Universidade de Vigo, Lagoas-Marcosende,  
36310 Vigo, Spain

<sup>b</sup>Dipartimento di Patologia generale, Seconda Università degli Studi di Napoli,  
Vico L. de Crecchio 7, 80138, Napoli, IT

<sup>c</sup>CNR-IGB, via P. Castellino, Napoli, Italy

<sup>d</sup>Department of Cancer Biology - Institut de Génétique et de Biologie Moléculaire et  
Cellulaire (IGBMC) / CNRS / INSERM / ULP, BP 163, 67404 Illkirch Cedex, C. U. de  
Strasbourg, France

qolera@uvigo.es; rar@uvigo.es

## TABLE OF CONTENTS

|                      |      |
|----------------------|------|
| NMR Data .....       | S-2  |
| Tables 1 and 2 ..... | S-12 |
| Biology .....        | S-16 |

### NMR Spectra

#### (2'R)-2,3-O-Isopropylidene-2,3-dihydroxy-1-prop-1-yl Pent-4-ynoate ((R)-4)

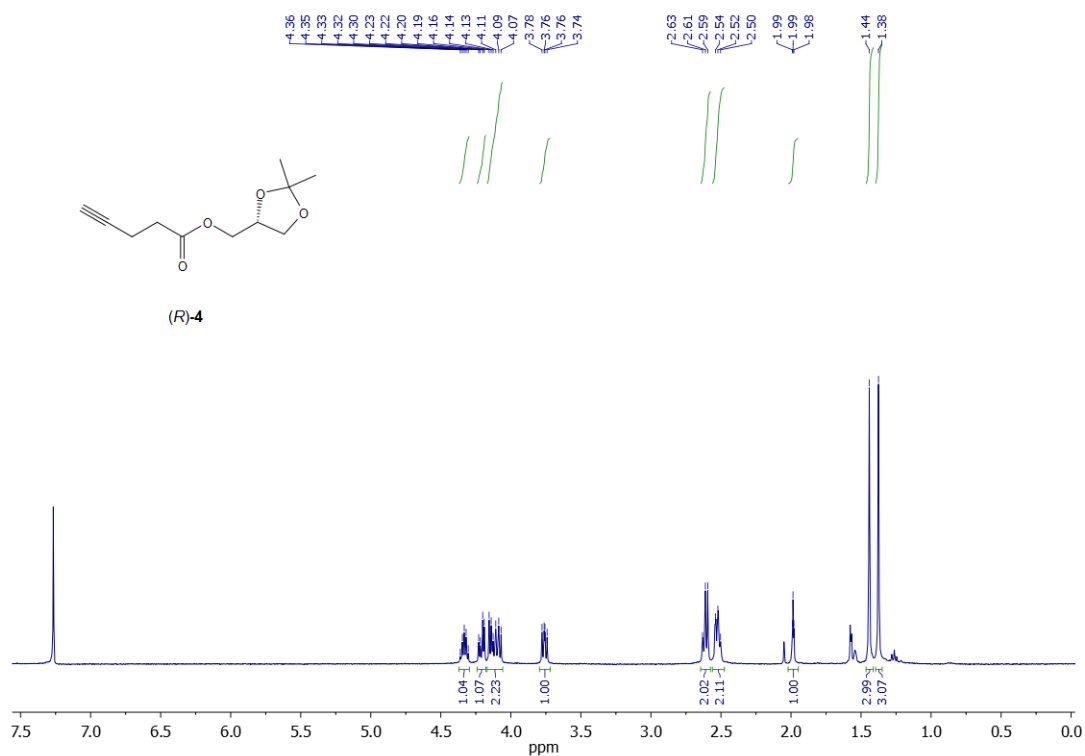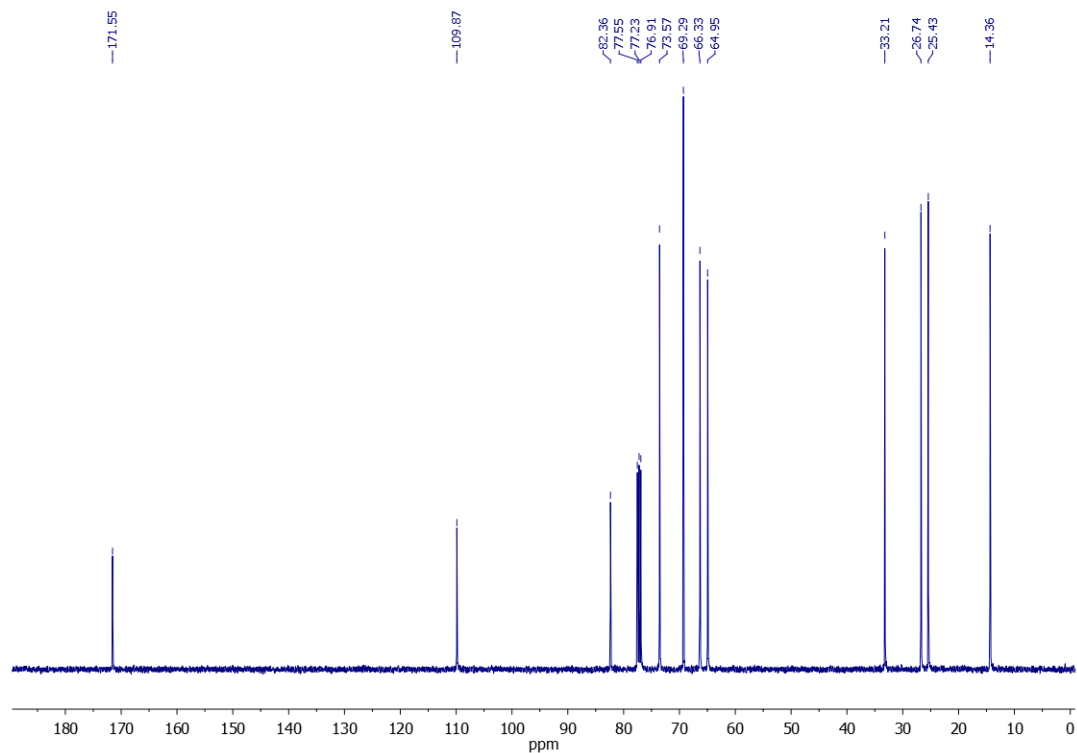

**(2'R)-2,3-O-Isopropylidene-2,3-dihydroxy-1-prop-1-yl 5-Iodopent-4-ynoate ((R)-5)**

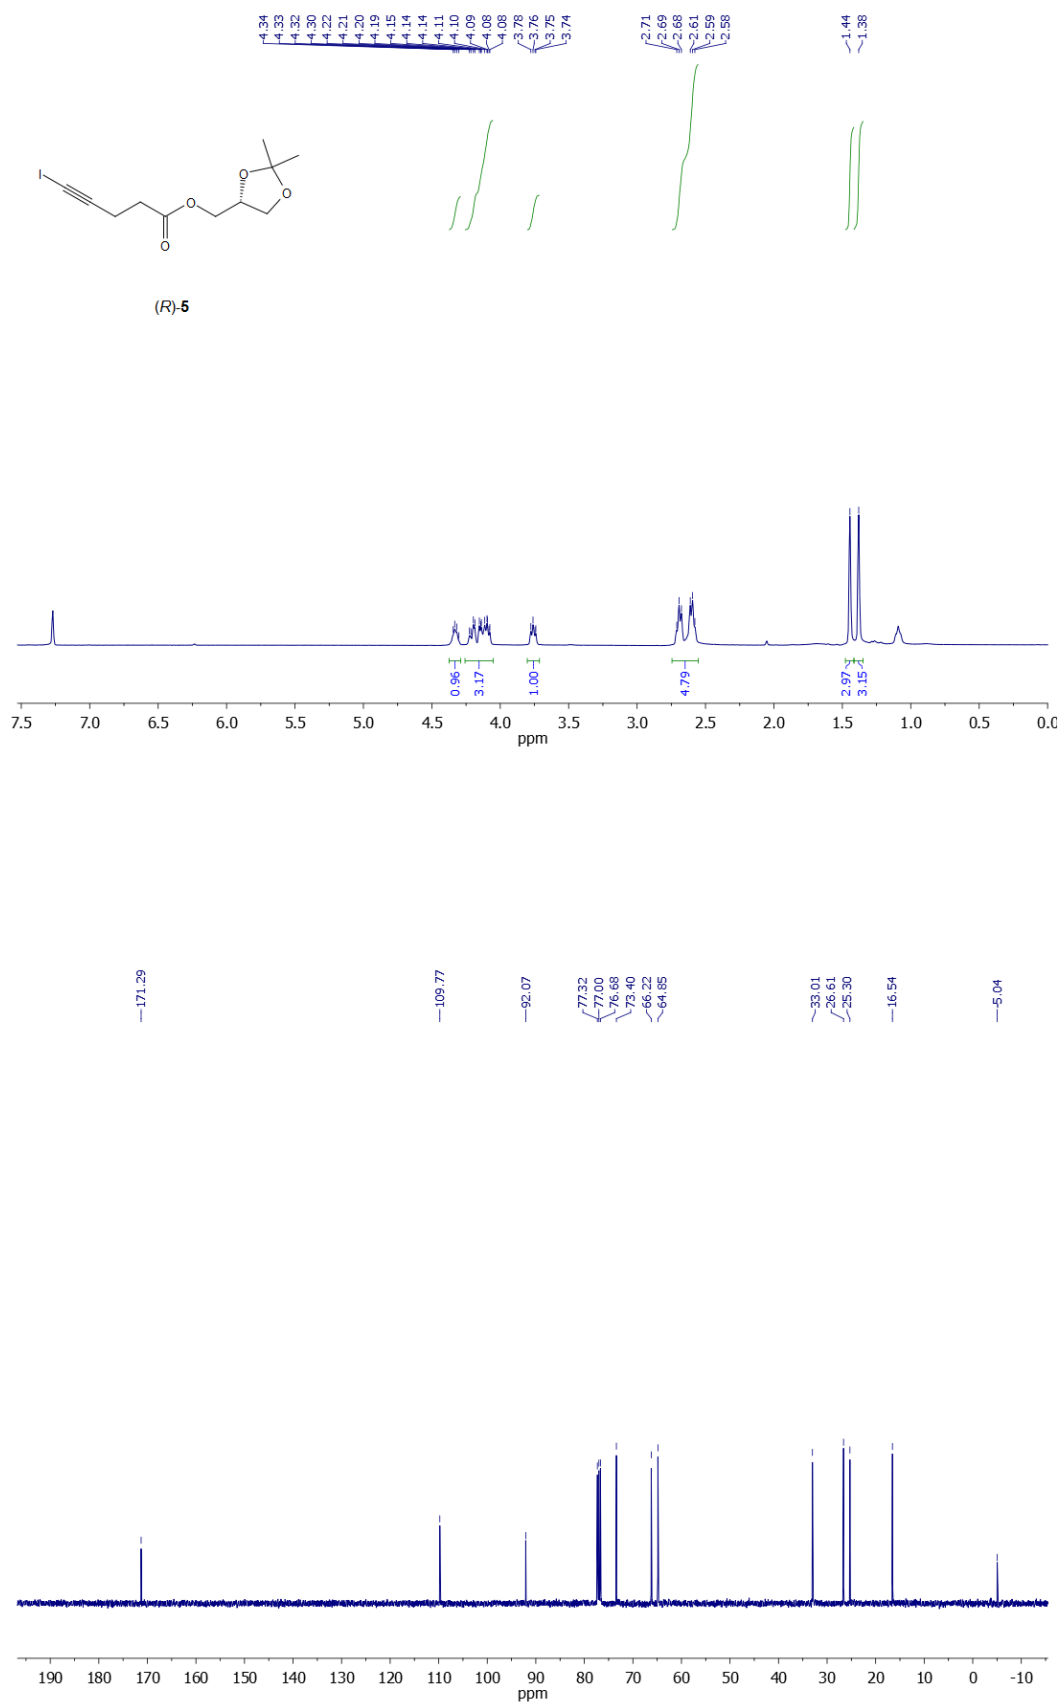

### *N*-Methoxy-*N*-methylhex-5-ynamide (7)

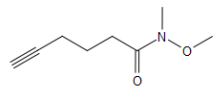

7

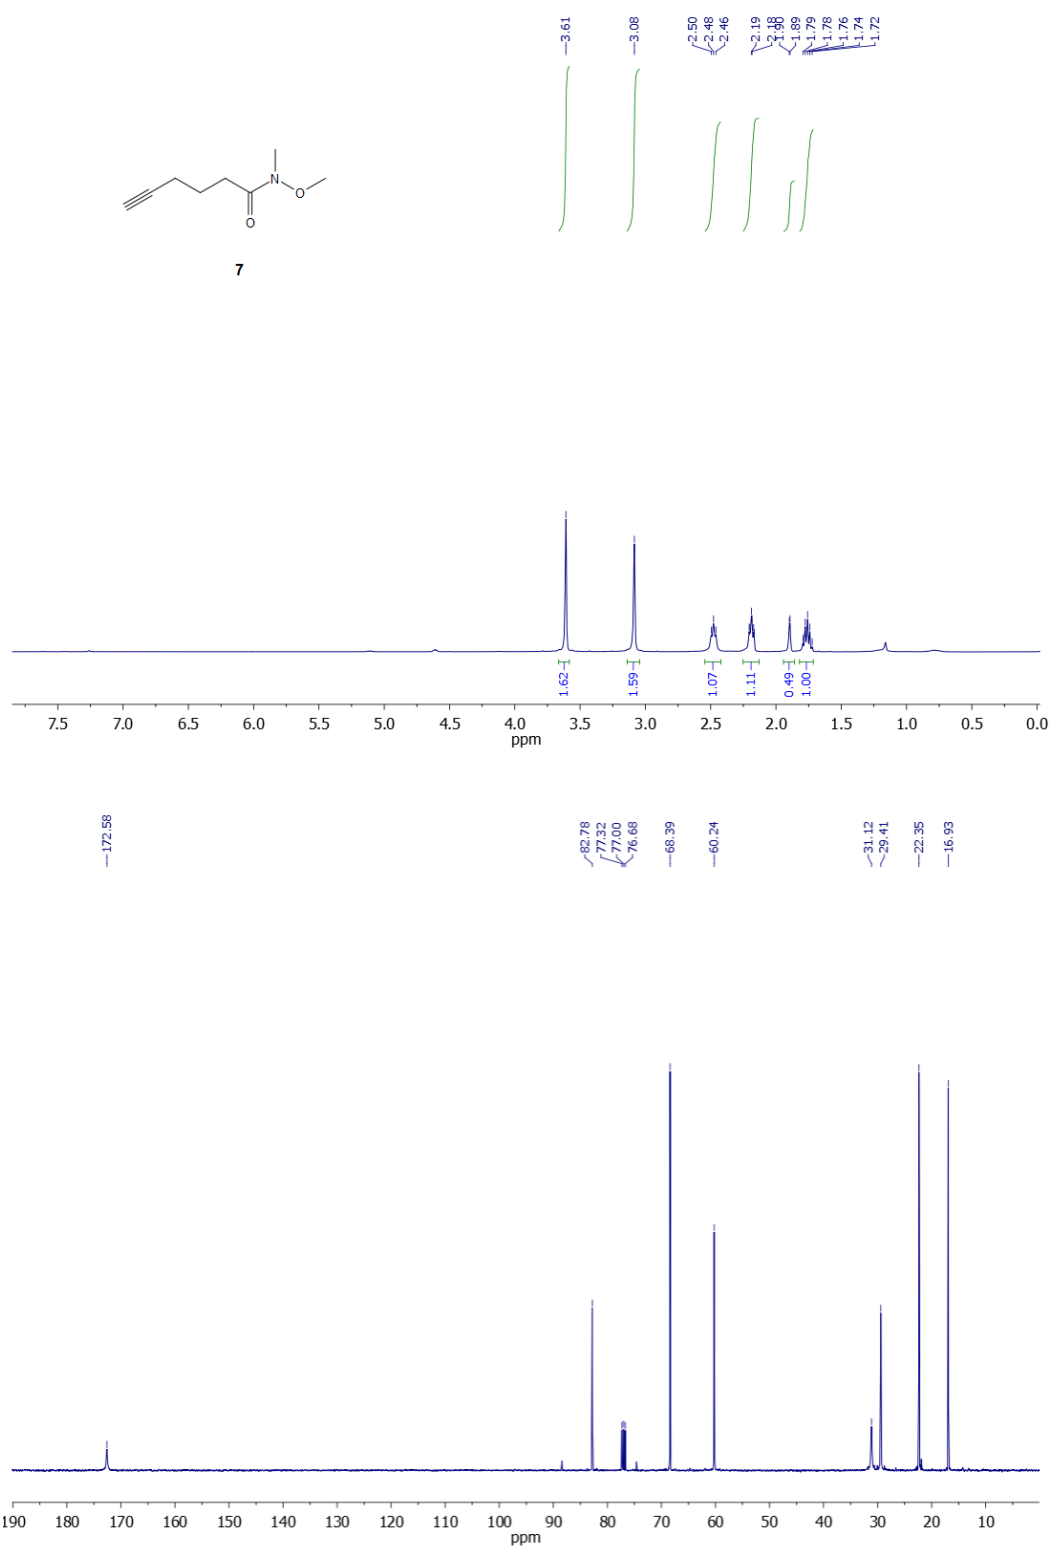

**(7Z,10Z)-1-(Triisopropylsilyl)trideca-7,10-dien-1-yn-3-ol (11)**

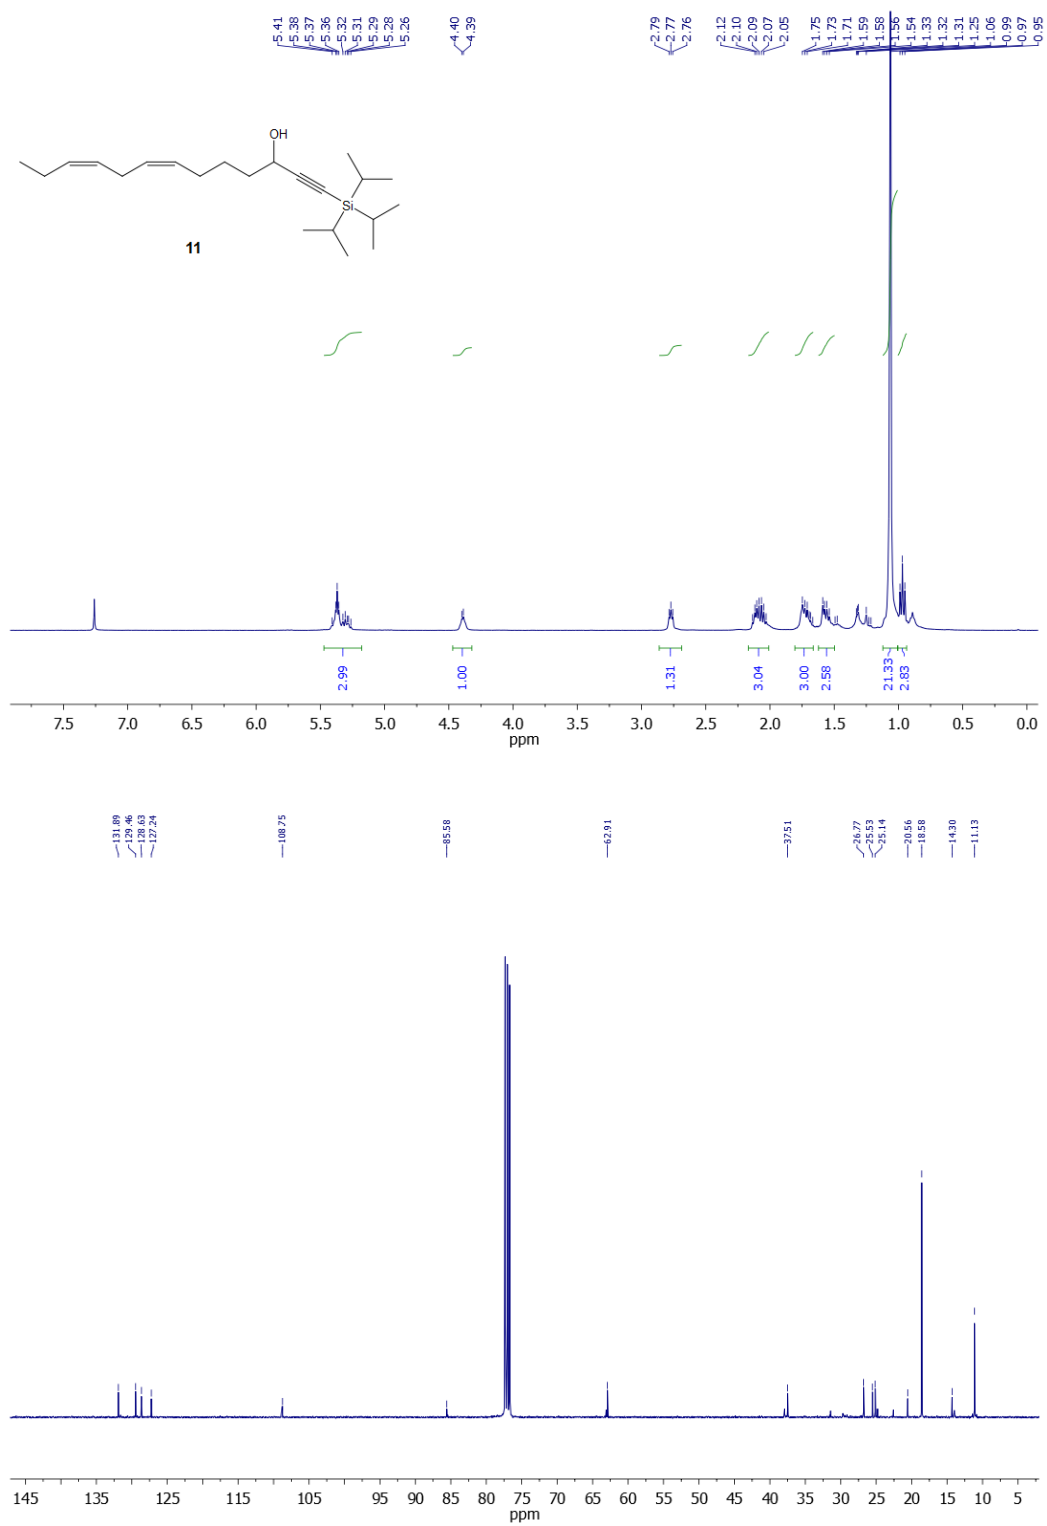

**(7Z,10Z)-Trideca-7,10-dien-1-yn-3-ol (12)**

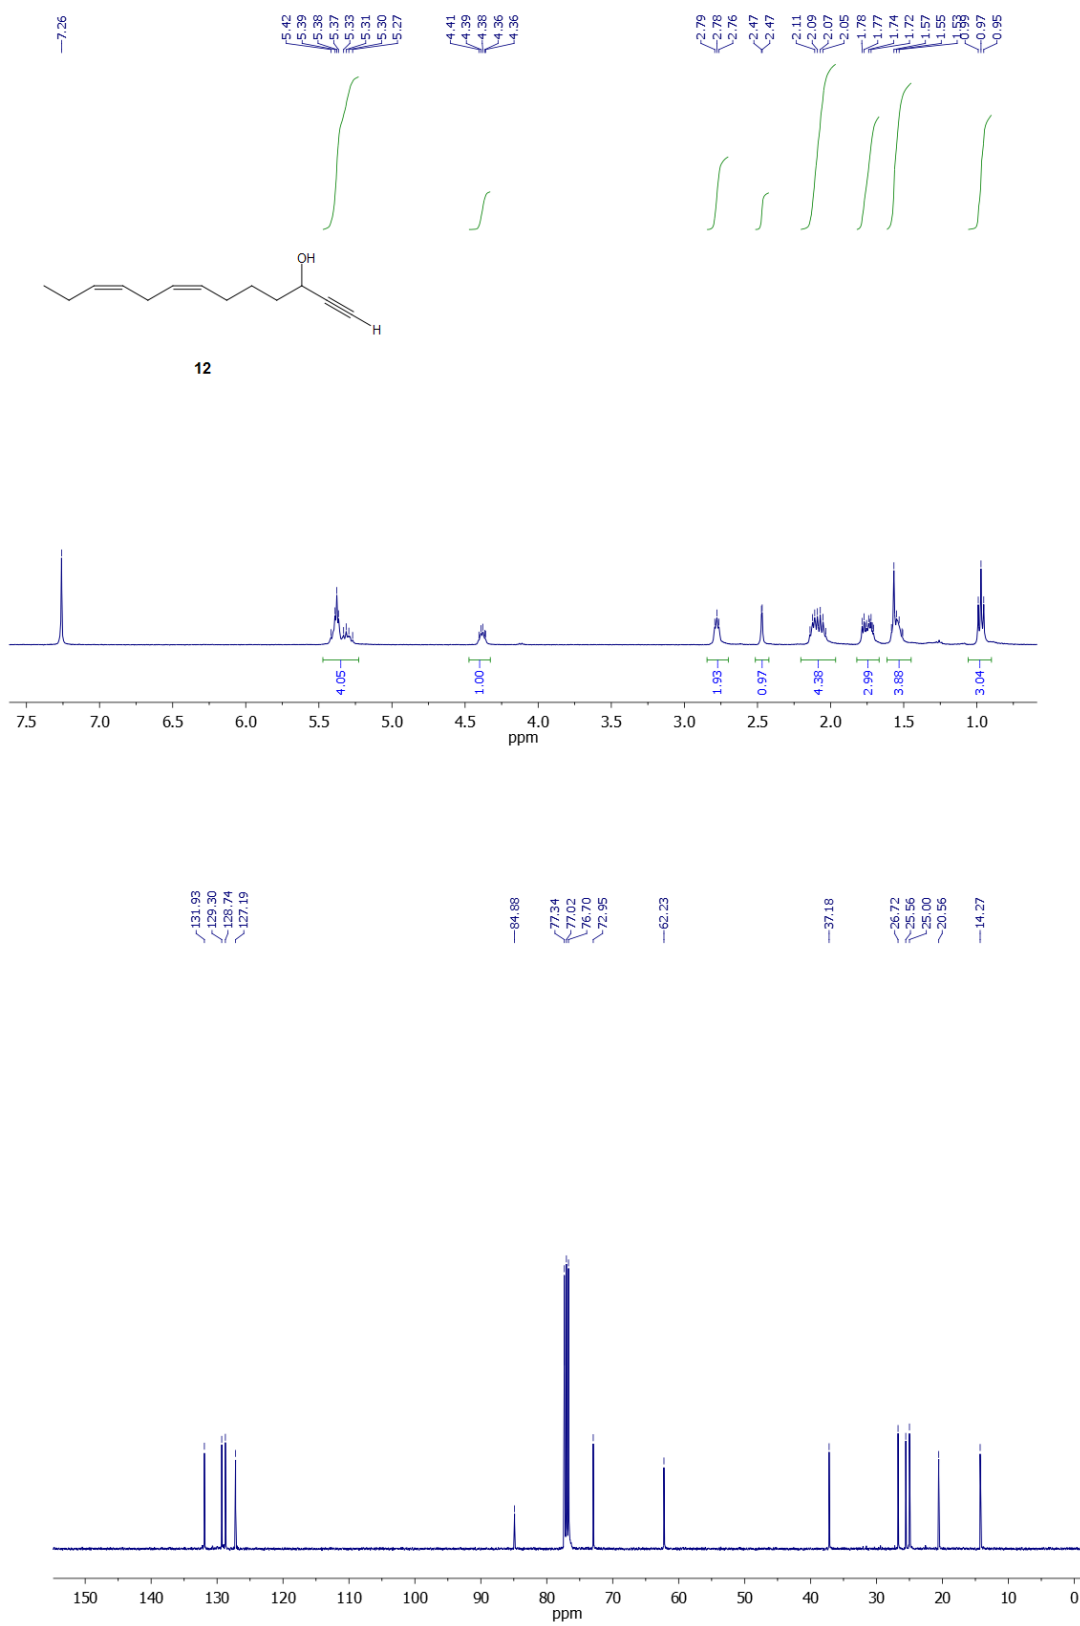

**(12Z,15Z)-(2'R)-2,3-O-Isopropylidene-2,3-dihydroxy-1-prop-1-yl 8-Hydroxyoctadeca-12,15-dien-4,6-diynoate ((R)-13)**

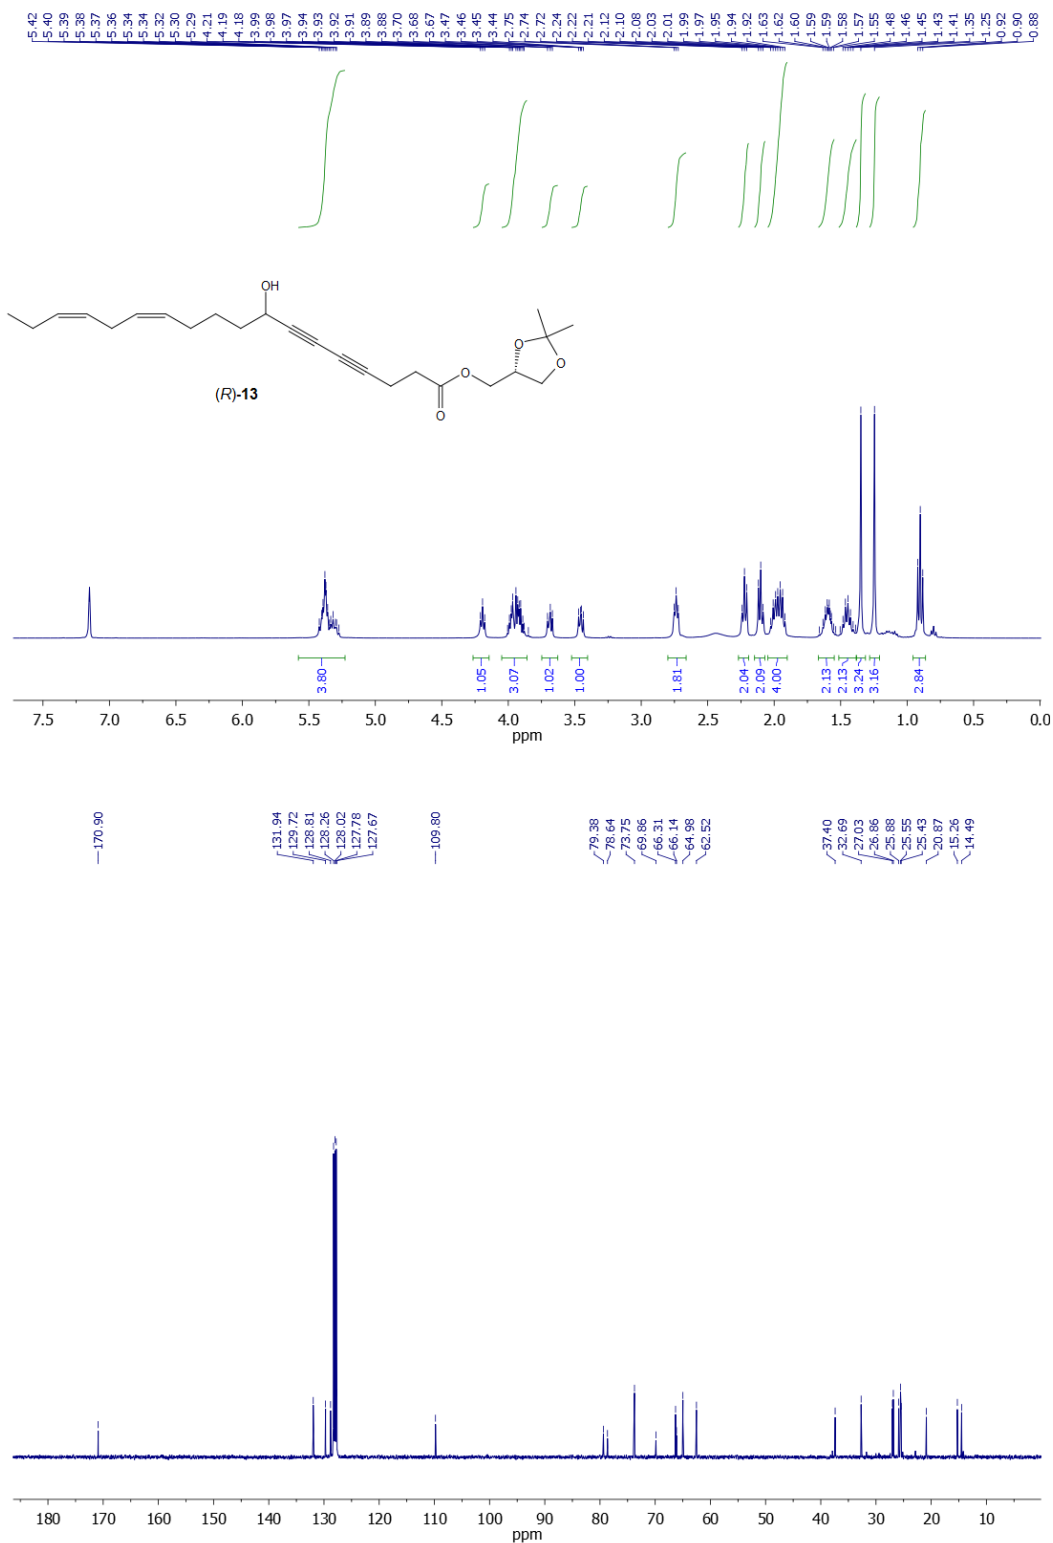

**(12Z,15Z)-(2'R)-2,3-O-Isopropylidene-2,3-dihydroxy-1-prop-1-yl 8-Oxo-octadeca-12,15-dien-4,6-diynoate ((R)-14)**

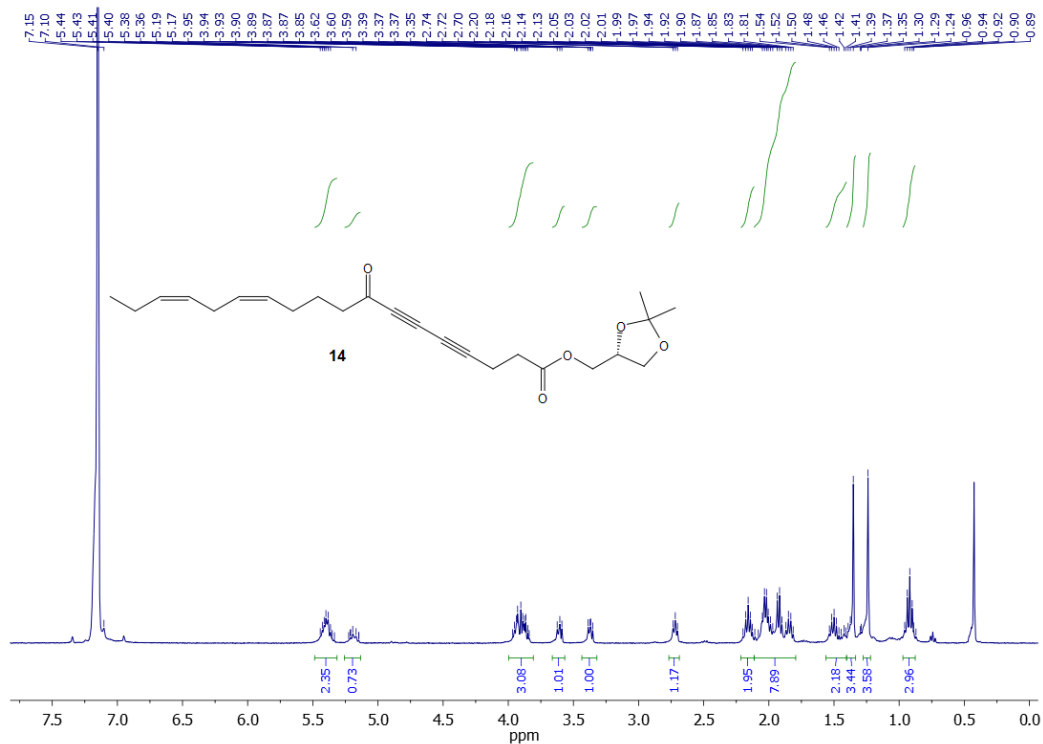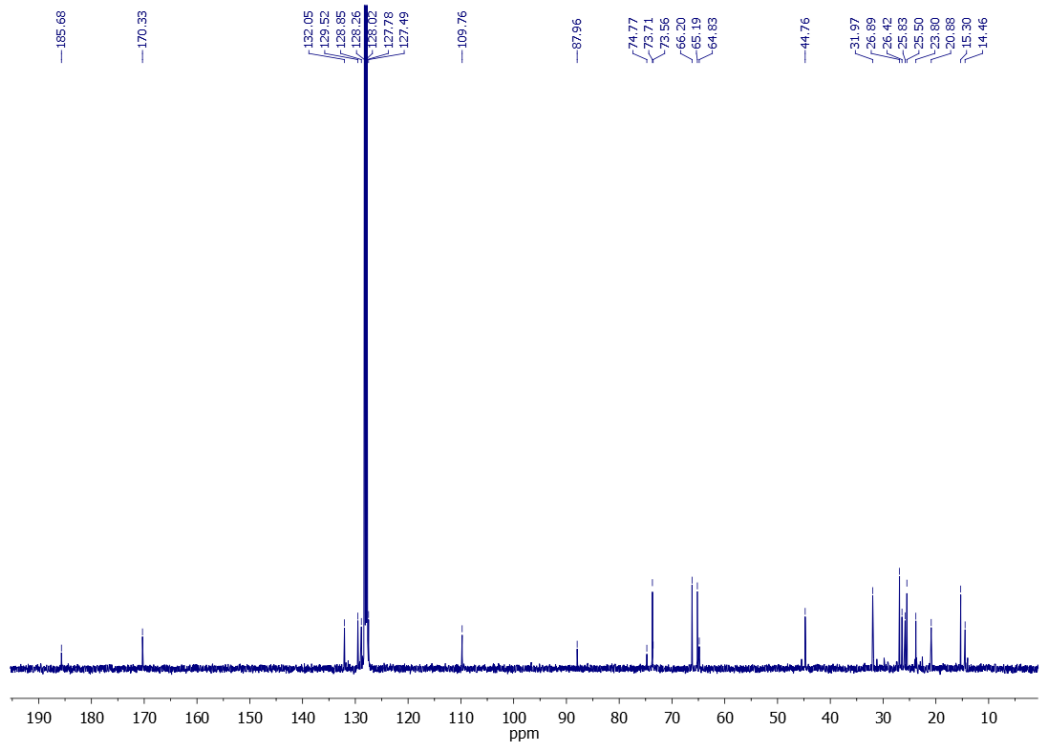



**(8E,12Z,15Z)-(2'R)-2,3-Dihydroxyprop-1-yl 8-Acetoxyoctadeca-8,12,15-trien-4,6-diynoate  
(E,R)-16.**

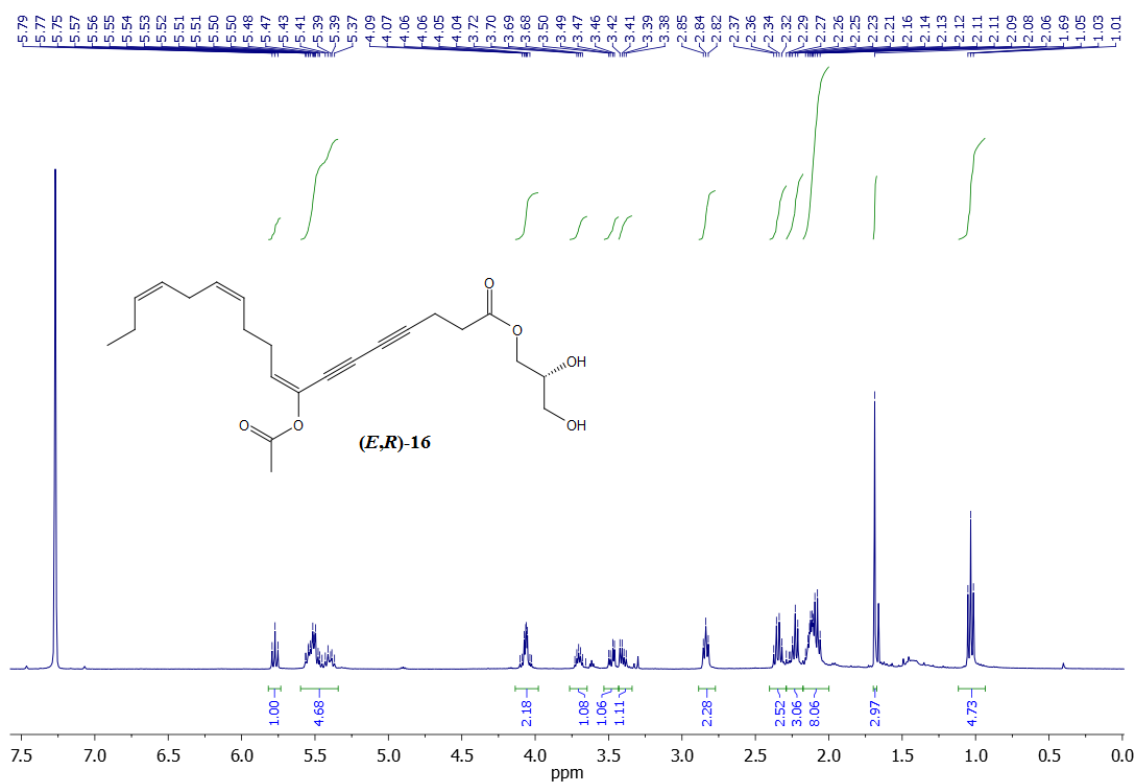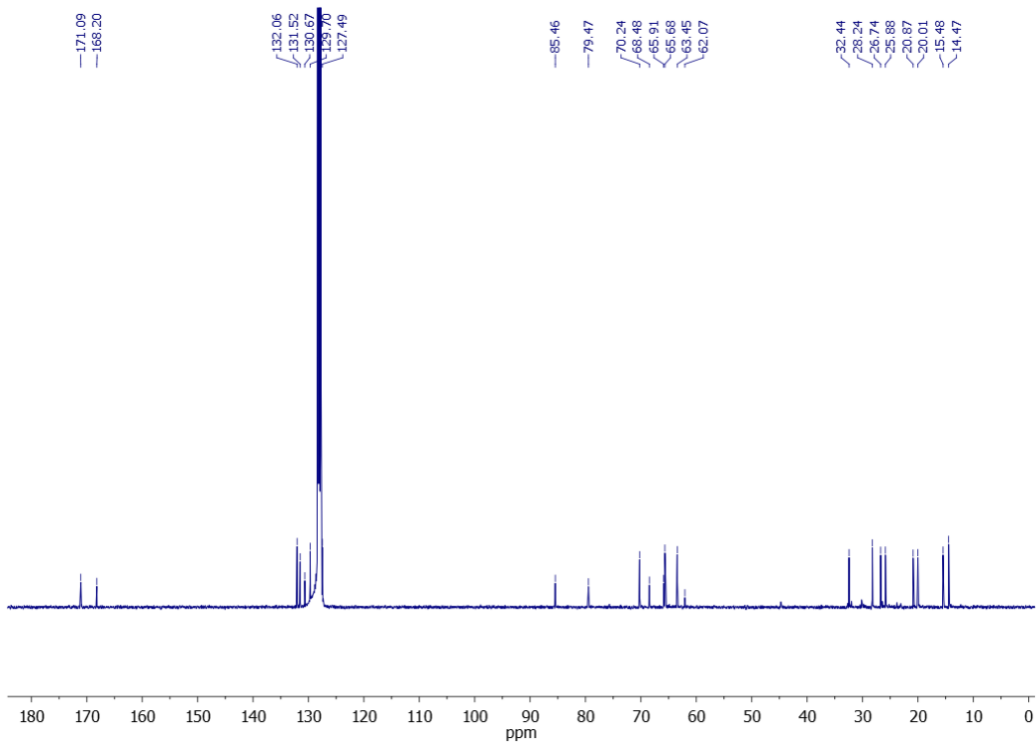

**(8Z,12Z,15Z)-(2'R)-2,3-Dihydroxyprop-1-yl 8-Acetoxyoctadeca-8,12,15-trien-4,6-diyanoate  
(Z,R)-16.**

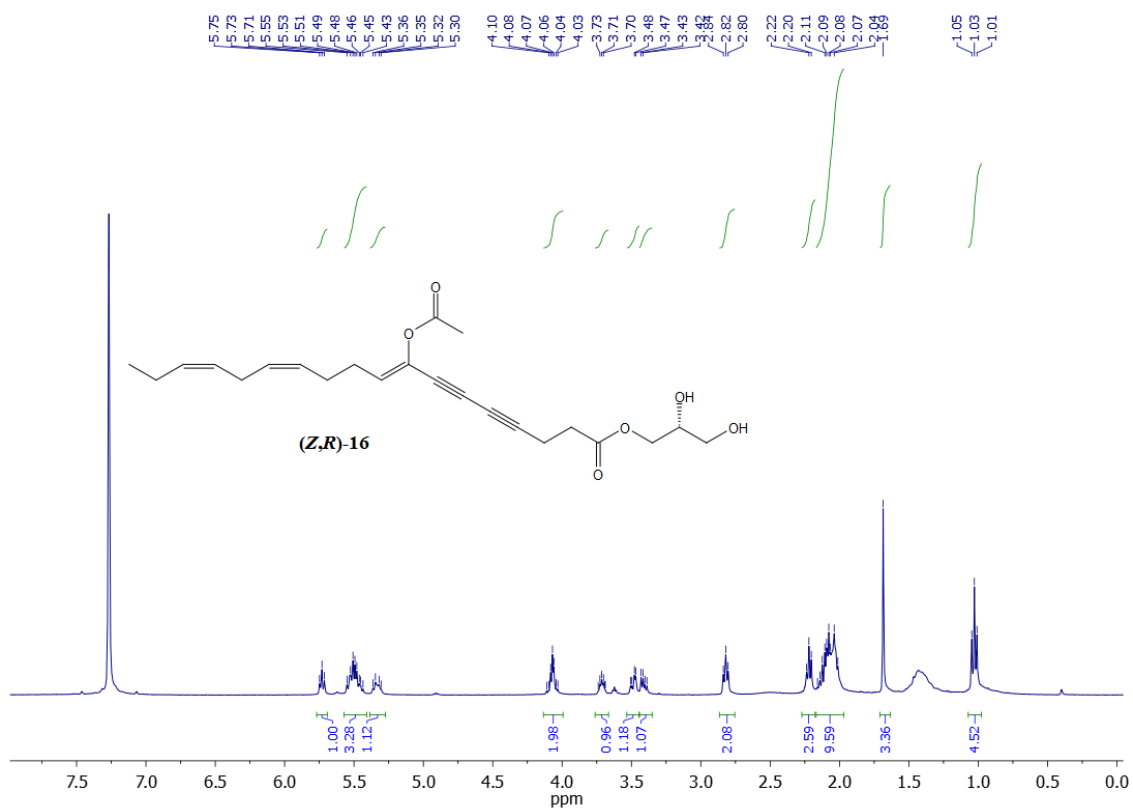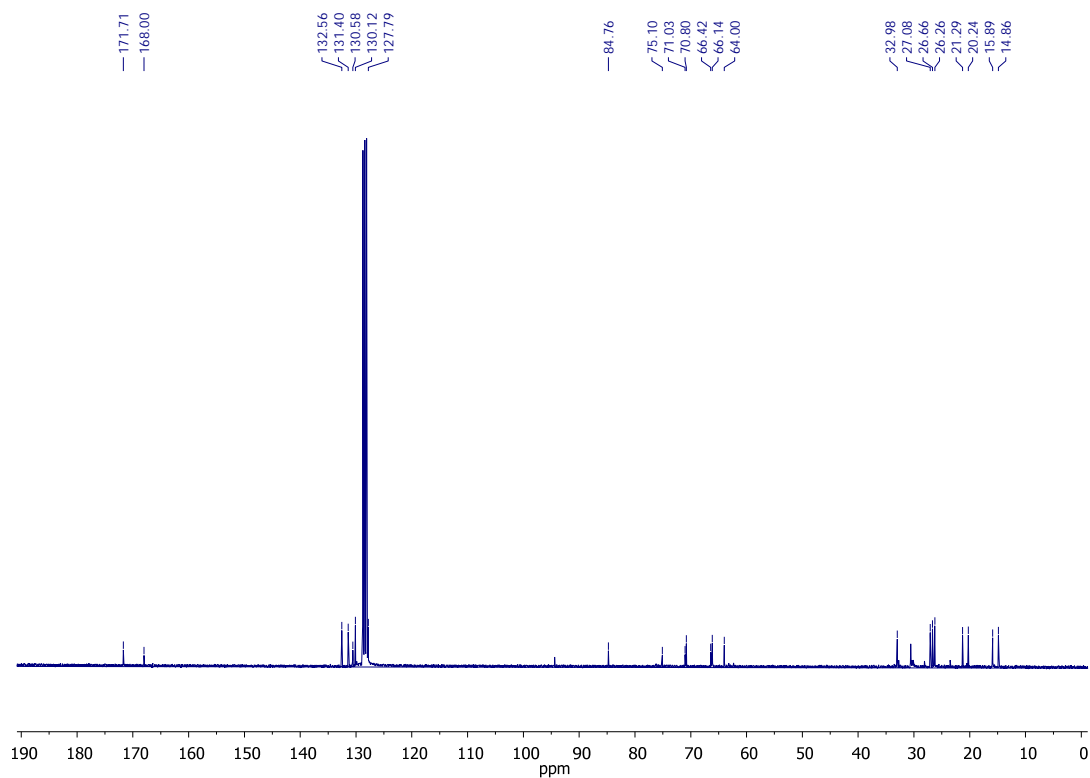

**(R)-17**  $^1\text{H}$ -RMN in  $\text{CDCl}_3$

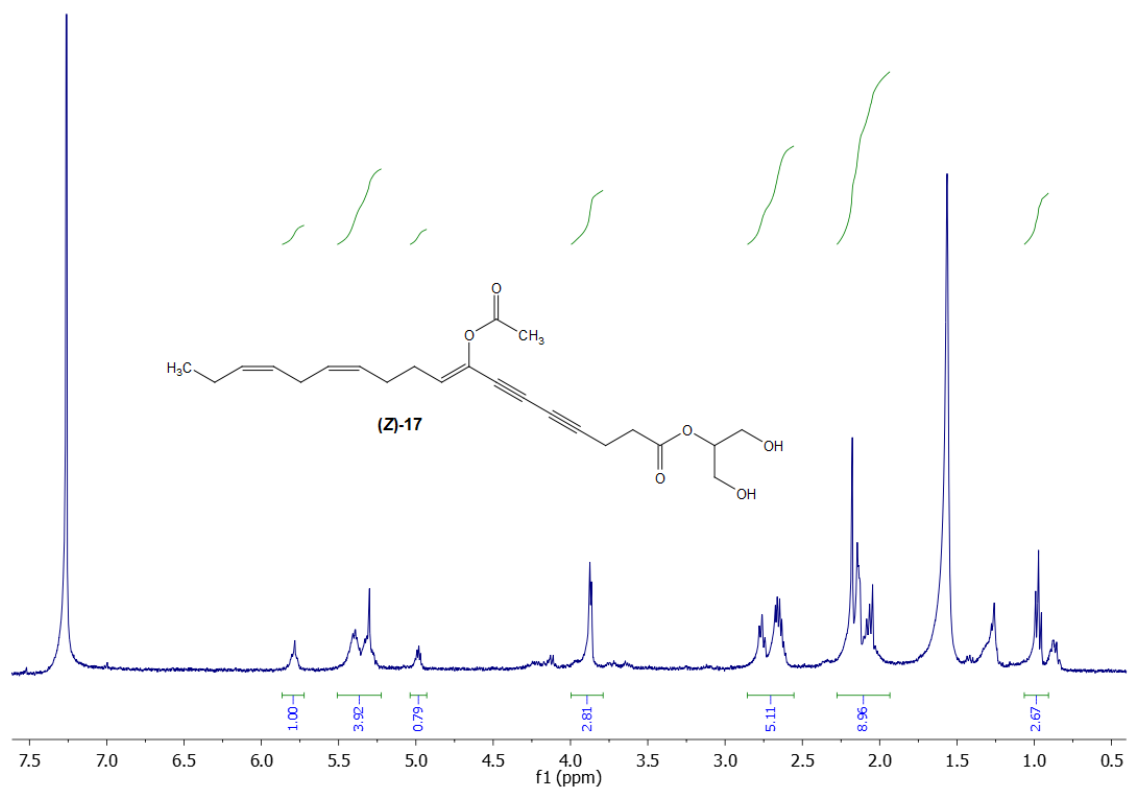

**(R)-17**  $^1\text{H}$ -RMN in  $\text{C}_6\text{D}_6$

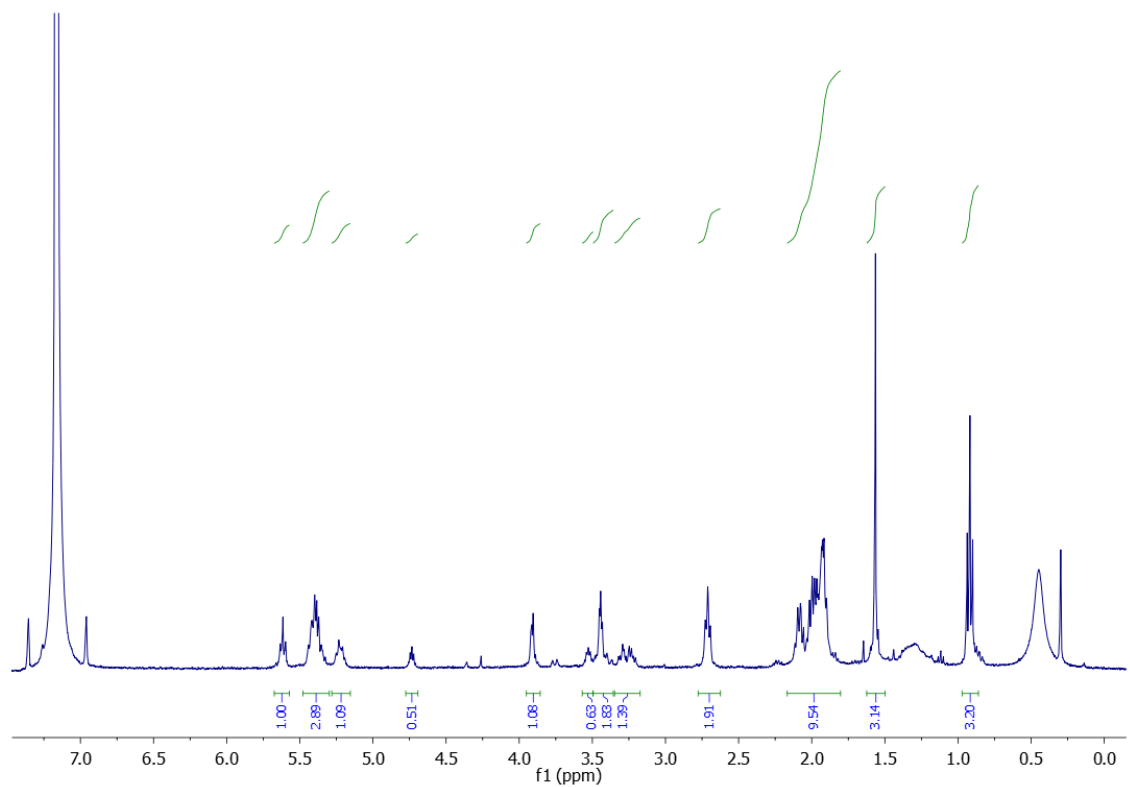

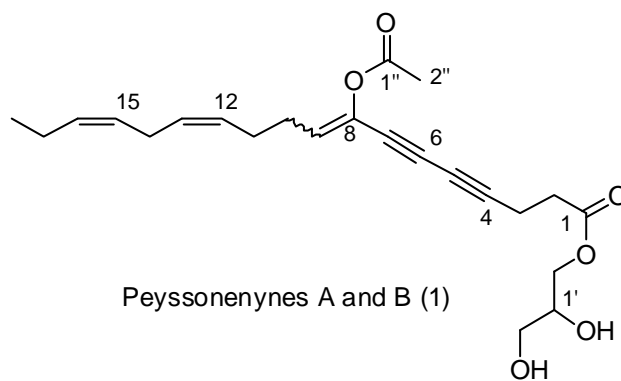

**Table 1.**  $^{13}\text{C}$  and  $^1\text{H}$  NMR Data for Peyssonenyne A (**1**,  $\text{CDCl}_3$ ), Peyssonenyne B (**2**,  $\text{CDCl}_3$ ) at 400 MHz, respectively

| Atom no.  | Natural source              |                                   |                             |                                   | Synthetic compounds   |                                   |                       |                                   |
|-----------|-----------------------------|-----------------------------------|-----------------------------|-----------------------------------|-----------------------|-----------------------------------|-----------------------|-----------------------------------|
|           | Peyssonenyne A ( <b>1</b> ) |                                   | Peyssonenyne B ( <b>2</b> ) |                                   | Peyssonenyne <i>E</i> |                                   | Peyssonenyne <i>Z</i> |                                   |
|           | $\delta_{\text{C}}$         | $\delta_{\text{H}}$ (mult., J/Hz) | $\delta_{\text{C}}$         | $\delta_{\text{H}}$ (mult., J/Hz) | $\delta_{\text{C}}$   | $\delta_{\text{H}}$ (mult., J/Hz) | $\delta_{\text{C}}$   | $\delta_{\text{H}}$ (mult., J/Hz) |
| <b>1</b>  | 171.8 C                     |                                   | 171.8 C                     |                                   | 171.8 C               |                                   | 171.8 C               |                                   |
| <b>2</b>  | 33.0 CH <sub>2</sub>        | 2.61 (ddd, 14.4, 2.0, 1.0)        | 32.8 CH <sub>2</sub>        | 2.62 (m)                          | 32.8 CH <sub>2</sub>  | 2.72 – 2.54 (m)                   | 32.8 CH <sub>2</sub>  | 2.70 – 2.56 (m)                   |
|           |                             | 2.63 (ddd, 14.4, 9.1, 1.4)        |                             |                                   |                       | 2.72 – 2.54 (m)                   |                       | 2.70 – 2.56 (m)                   |
| <b>3</b>  | 15.8 CH <sub>2</sub>        | 2.65 (ddd, 14.4, 2.0, 1.4)        | 15.6 CH <sub>2</sub>        | 2.66 (m)                          | 15.8 CH <sub>2</sub>  | 2.72 – 2.54 (m)                   | 15.7 CH <sub>2</sub>  | 2.70 – 2.56 (m)                   |
|           |                             | 2.66 (ddd, 14.4, 9.1, 1.0)        |                             |                                   |                       | 2.72 – 2.54 (m)                   |                       | 2.70 – 2.56 (m)                   |
| <b>4</b>  | 83.5 C                      |                                   | 83.3 C                      |                                   | 84.6 C                |                                   | 83.4 C                |                                   |
| <b>5</b>  | 65.81 C                     |                                   | 65.7 C                      |                                   | 65.6 C                |                                   | 65.6 C                |                                   |
| <b>6</b>  | 74.1 C                      |                                   | 73.6 C                      |                                   | 78.9 C                |                                   | 74.0 C                |                                   |
| <b>7</b>  | 69.8 C                      |                                   | 70.0 C                      |                                   | 67.5 C                |                                   | 70.0 C                |                                   |
| <b>8</b>  | 129.5 C                     |                                   | 128.9 C                     |                                   | 129.9 C               |                                   | 129.4 C               |                                   |
| <b>9</b>  | 131.1 CH                    | 5.78 (t, 9.4)                     | 131.1 CH                    | 5.78 (m)                          | 131.6 CH              | 5.81 (t, 7.9)                     | 131.1 CH              | 5.78 (t, 7.4)                     |
| <b>10</b> | 26.2 CH <sub>2</sub>        | 2.13 (d, 10.5)                    | 26.2 CH <sub>2</sub>        | 2.13 (m)                          | 26.6 CH <sub>2</sub>  | 2.38 – 2.30 (m)                   | 26.1 CH <sub>2</sub>  | 2.16 – 2.11 (m)                   |
| <b>11</b> | 26.6 CH <sub>2</sub>        | 2.13 (d, 10.5)                    | 26.2 CH <sub>2</sub>        | 2.13 (m)                          | 28.1 CH <sub>2</sub>  | 2.25 – 2.16 (m)                   | 26.5 CH <sub>2</sub>  | 2.16 – 2.11 (m)                   |
| <b>12</b> | 129.9 CH                    | 5.40 (m)                          | 130.5 CH                    | 5.40 (m)                          | 129.7 CH              | 5.46 – 5.23 (m)                   | 129.7 CH              | 5.45 – 5.23 (m)                   |

|            |                       |                      |                      |               |                      |                      |                      |                      |
|------------|-----------------------|----------------------|----------------------|---------------|----------------------|----------------------|----------------------|----------------------|
| <b>13</b>  | 128.2 CH              | 5.31 (m)             | 128.0 CH             | 5.31 (m)      | 128.2 CH             | 5.46 – 5.23 (m)      | 128.1 CH             | 5.45 – 5.23 (m)      |
| <b>14</b>  | 25.8 CH <sub>2</sub>  | 2.75 (br t, 7.1)     | <i>b</i>             | 2.75 (t, 7.4) | 25.7 CH <sub>2</sub> | 2.77 (t, 6.6)        | 25.6 CH <sub>2</sub> | 2.75 (t, 7.1)        |
| <b>15</b>  | 127.1 CH              | 5.29 (m)             | 127.2 CH             | 5.29 (m)      | 127.1 CH             | 5.46 – 5.23 (m)      | 127.0 CH             | 5.45 – 5.23 (m)      |
| <b>16</b>  | 132.3 CH              | 5.38 (m)             | 132.2 CH             | 5.38 (m)      | 132.2 CH             | 5.46 – 5.23 (m)      | 132.2 CH             | 5.45 – 5.23 (m)      |
| <b>17</b>  | 20.8 CH <sub>2</sub>  | 2.06 (br p, 7.6)     | 20.5 CH <sub>2</sub> | 2.06 (m)      | 20.7 CH <sub>2</sub> | 2.12 – 2.01 (m)      | 20.7 CH <sub>2</sub> | 2.10 – 2.00 (m)      |
| <b>18</b>  | 14.5 CH <sub>3</sub>  | 0.97 (t, 7.6)        | 14.1 CH <sub>3</sub> | 0.97 (t, 7.4) | 14.4 CH <sub>3</sub> | 0.97 (t, 7.5)        | 14.4 CH <sub>3</sub> | 0.97 (t, 7.5)        |
| <b>1'</b>  | 65.83 CH <sub>2</sub> | 4.19 (dd, 14.4, 7.5) | <i>b</i>             | 4.19 (m)      | 65.8 CH <sub>2</sub> | 4.19 (dd, 11.6, 6.0) | 65.7 CH <sub>2</sub> | 4.24 (dd, 11.6, 4.8) |
|            |                       | 4.24 (dd, 14.4, 5.8) |                      |               |                      | 4.25 (dd, 11.6, 4.7) |                      | 4.18 (dd, 11.6, 5.9) |
| <b>2'</b>  | 70.3 CH               | 3.96 (br s)          | <i>b</i>             | 3.96 (m)      | 70.2 CH              | 4.00 – 3.92 (m, 1H)  | 70.2 CH              | 3.99 – 3.91 (m)      |
| <b>3'</b>  | 63.5 CH <sub>2</sub>  | 3.63 (dd, 14.1, 7.6) | <i>b</i>             | 3.63 (m)      | 63.4 CH <sub>2</sub> | 3.62 (dd, 11.3, 6.1) | 63.4 CH <sub>2</sub> | 3.61 (dd, 11.4, 6.1) |
|            |                       | 3.72 (dd, 14.1, 4.5) |                      | 3.72 (m)      |                      | 3.72 (dd, 11.3, 3.9) |                      | 3.72 (dd, 10.6, 3.0) |
| <b>1''</b> | 168.4 C               |                      | 168.1 C              |               | 169.1 C              |                      | 168.4 C              |                      |
| <b>2''</b> | 20.8 CH <sub>3</sub>  | 2.17 (s)             | <i>b</i>             | 2.17 (s)      | 20.9 CH <sub>3</sub> | 2.14 (s)             | 20.6 CH <sub>3</sub> | 2.17 (s)             |

**Table 2.**  $^{13}\text{C}$  and  $^1\text{H}$  NMR Data for Peyssonenyne B (**2**,  $\text{C}_6\text{D}_6$ ), Peyssonenyne *E* and *Z* ( $\text{C}_6\text{D}_6$ ) at 400 MHz, respectively

| Atom no.  | Natural source              |                                   | Synthetic             |                                                                                         |                       |                                                                                            |
|-----------|-----------------------------|-----------------------------------|-----------------------|-----------------------------------------------------------------------------------------|-----------------------|--------------------------------------------------------------------------------------------|
|           | Peyssonenyne B ( <b>2</b> ) |                                   | Peyssonenyne <i>E</i> |                                                                                         | Peyssonenyne <i>Z</i> |                                                                                            |
|           | $\delta_{\text{C}}$         | $\delta_{\text{H}}$ (mult., J/Hz) | $\delta_{\text{C}}$   | $\delta_{\text{H}}$ (mult., J/Hz)                                                       | $\delta_{\text{C}}$   | $\delta_{\text{H}}$ (mult., J/Hz)                                                          |
| <b>1</b>  | 170.9 C                     |                                   | 171.1 C               |                                                                                         | 171.7 C               |                                                                                            |
| <b>2</b>  | 32.4 $\text{CH}_2$          | 1.90 (m)                          | 32.4 $\text{CH}_2$    | 2.0-1.9 (m, 6H, 2H <sub>2</sub> + 2H <sub>10</sub> + 2H <sub>11</sub> )                 | 33.0 $\text{CH}_2$    | 2.0-1.9 (m, 8H, 2H <sub>2</sub> + 2H <sub>10</sub> + 2H <sub>11</sub> + 2H <sub>17</sub> ) |
| <b>3</b>  | 15.4 $\text{CH}_2$          | 2.07 (m)                          | 15.5 $\text{CH}_2$    | 2.3-2.2 (m, 2H, 2H <sub>3</sub> )                                                       | 15.9 $\text{CH}_2$    | 2.11 (t, <i>J</i> = 7.0 Hz, 2H, 2H <sub>3</sub> )                                          |
| <b>4</b>  | 83.8 C                      |                                   | 85.5 C                |                                                                                         | 84.8 C                |                                                                                            |
| <b>5</b>  | 65.7 C                      |                                   | 65.9 C                |                                                                                         | 66.4 C                |                                                                                            |
| <b>6</b>  | 74.4 C                      |                                   | 79.5 C                |                                                                                         | 75.1 C                |                                                                                            |
| <b>7</b>  | 70.5 C                      |                                   | 68.5 C                |                                                                                         | 71.0 C                |                                                                                            |
| <b>8</b>  | 129.9 CH                    |                                   | 130.7 C               |                                                                                         | 130.6 C               |                                                                                            |
| <b>9</b>  | 130.6 CH                    | 5.62 (t, 6.9)                     | 132.1 CH              | 5.65 (t, <i>J</i> = 8.1 Hz, 1H, H <sub>9</sub> )                                        | 132.6 CH              | 5.62 (t, <i>J</i> = 7.3 Hz, 1H, H <sub>9</sub> )                                           |
| <b>10</b> | 26.2 $\text{CH}_2$          | 1.99 (m)                          | 26.7 $\text{CH}_2$    | 2.0-1.9 (m, 6H, 2H <sub>2</sub> + 2H <sub>10</sub> + 2H <sub>11</sub> )                 | 26.7 $\text{CH}_2$    | 2.0-1.9 (m, 8H, 2H <sub>2</sub> + 2H <sub>10</sub> + 2H <sub>11</sub> + 2H <sub>17</sub> ) |
| <b>11</b> | 26.4 $\text{CH}_2$          | 1.92 (m)                          | 28.2 $\text{CH}_2$    | 2.0-1.9 (m, 6H, 2H <sub>2</sub> + 2H <sub>10</sub> + 2H <sub>11</sub> )                 | 27.1 $\text{CH}_2$    | 2.0-1.9 (m, 8H, 2H <sub>2</sub> + 2H <sub>10</sub> + 2H <sub>11</sub> + 2H <sub>17</sub> ) |
| <b>12</b> | 128.1 CH                    | 5.23 (m)                          | 128.4 CH              | 5.5-5.2 (m, 4H, H <sub>12</sub> + H <sub>13</sub> + H <sub>15</sub> + H <sub>16</sub> ) | 131.4 CH              | 5.3-5.2 (m, 1H)                                                                            |
| <b>13</b> | 129.9 CH                    | 5.42 (m)                          | 129.7 CH              | 5.5-5.2 (m, 4H, H <sub>12</sub> + H <sub>13</sub> + H <sub>15</sub> + H <sub>16</sub> ) | 128.8 CH              | 5.4-5.3 (m, 3H)                                                                            |
| <b>14</b> | 25.4 $\text{CH}_2$          | 2.71 (t, 6.6)                     | 25.9 $\text{CH}_2$    | 2.72 (t, <i>J</i> = 6.5 Hz, 2H, 2H <sub>14</sub> )                                      | 26.2 $\text{CH}_2$    | 2.71 (t, <i>J</i> = 6.8 Hz, 2H, 2H <sub>14</sub> )                                         |
| <b>15</b> | 126.8 CH                    | 5.37 (m)                          | 127.5 CH              | 5.5-5.2 (m, 4H, H <sub>12</sub> + H <sub>13</sub> )                                     | 127.8 CH              | 5.4-5.3 (m, 3H)                                                                            |

|            |                      |               |                      |                                                                                               |                      |                                                                                                     |
|------------|----------------------|---------------|----------------------|-----------------------------------------------------------------------------------------------|----------------------|-----------------------------------------------------------------------------------------------------|
|            |                      |               |                      | + H <sub>15</sub> + H <sub>16</sub> )                                                         |                      |                                                                                                     |
| <b>16</b>  | 130.4 CH             | 5.42 (m)      | 131.5 CH             | 5.5-5.2 (m,<br>4H, H <sub>12</sub> + H <sub>13</sub><br>+ H <sub>15</sub> + H <sub>16</sub> ) | 130.1 CH             | 5.4-5.3 (m,<br>3H)                                                                                  |
| <b>17</b>  | 21.3 CH <sub>2</sub> | 2.02 (m)      | 20.0 CH <sub>2</sub> | 2.10 (t, <i>J</i> =<br>7.0 Hz, 2H,<br>2H <sub>17</sub> )                                      | 21.3 CH <sub>2</sub> | 2.0-1.9 (m,<br>8H, 2H <sub>2</sub> +<br>2H <sub>10</sub> + 2H <sub>11</sub> +<br>2H <sub>17</sub> ) |
| <b>18</b>  | 15.2 CH <sub>3</sub> | 0.92 (t, 7.5) | 14.5 CH <sub>3</sub> | 0.91 (t, <i>J</i> =<br>7.4 Hz, 3H,<br>CH <sub>3</sub> )                                       | 14.8 CH <sub>3</sub> | 0.91 (t, <i>J</i> =<br>7.5 Hz, 3H,<br>CH <sub>3</sub> )                                             |
| <b>1'</b>  | 65.3 CH <sub>2</sub> | 3.91 (d, 5.8) | 65.7 CH <sub>3</sub> | 4.0-3.9 (m,<br>2H, 2H <sub>1'</sub> )                                                         | 66.1 CH <sub>2</sub> | 4.0-3.9 (m,<br>2H, 2H <sub>1'</sub> )                                                               |
| <b>2'</b>  | 69.9 CH              | 3.52 (br s)   | 70.2 CH              | 3.6-3.5 (m,<br>1H, H <sub>2'</sub> )                                                          | 70.8 CH              | 3.6-3.5 (m,<br>1H, H <sub>2'</sub> )                                                                |
| <b>3'</b>  | 63.2 CH <sub>2</sub> | 3.29 (m)      | 63.4 CH <sub>2</sub> | 3.37 (dd, <i>J</i> =<br>11.0, 3.6 Hz,<br>1H, H <sub>3'</sub> )                                | 64.0 CH <sub>2</sub> | 3.37 (dd, <i>J</i> =<br>11.2, 3.9 Hz,<br>1H, H <sub>3'</sub> )                                      |
|            |                      | 3.23 (m)      |                      | 3.29 (dd, <i>J</i> =<br>11.3, 6.0 Hz,<br>1H, H <sub>3'</sub> )                                |                      | 3.29 (dd, <i>J</i> =<br>11.2 and 6.0<br>Hz, 1H, H <sub>3'</sub> )                                   |
| <b>1''</b> | 167.2 C              |               | 168.2 C              |                                                                                               | 168.0 C              |                                                                                                     |
| <b>2''</b> | 19.5 CH <sub>3</sub> | 1.55 (s)      | 20.9 CH <sub>3</sub> | 2.0-1.9 (m,<br>6H, 2H <sub>2</sub> +<br>2H <sub>10</sub> + 2H <sub>11</sub> )                 | 20.2 CH <sub>3</sub> | 1.57 (s, 3H,<br>OC(O) <u>C</u> H <sub>3</sub> )                                                     |

## **Biology**

### ***Bisulfite treatment and PCR for RAR $\beta$ methylation***

20  $\mu\text{g}$  of genomic DNA (or in vitro methylated DNA) were mixed with 5.5  $\mu\text{L}$  of 3M NaOH, the volume was adjusted to 55.5  $\mu\text{L}$  with filtered water. After 15 min incubation at 42  $^{\circ}\text{C}$ , 500  $\mu\text{L}$  of 3M sodium bisulfite solution containing 0.05M hydroquinone were added. The mixture was incubated at 54  $^{\circ}\text{C}$  for 16 h. The modified DNA was purified with Nucleospin extract purification kit and eluted with 50  $\mu\text{L}$  of filtered water. The eluate is desulfonated with 5.5  $\mu\text{L}$  of 3M NaOH for 15 min at room temperature. 16.8  $\mu\text{L}$  of 10M ammonium acetate, 1  $\mu\text{L}$  glycol-blue and 200  $\mu\text{L}$  ethanol were added for the DNA precipitation. The DNA is recovered after centrifugation, washed, air dried and resuspended with 50  $\mu\text{L}$  of filtered water. PCR was performed as follows: 5 min for denaturation at 94  $^{\circ}\text{C}$ , 35 cycles, 1 min denaturation at 94  $^{\circ}\text{C}$ , 1 min annealing at 57.5  $^{\circ}\text{C}$  for the methylated primer and 52  $^{\circ}\text{C}$  for the unmethylated primer, 1 min elongation at 72  $^{\circ}\text{C}$ , 5 min further elongation at 72  $^{\circ}\text{C}$ . The PCR product (10  $\mu\text{L}$  + 5  $\mu\text{L}$  loading dye) is analyzed on 1.5% agarose gel.

RAR $\beta$ 2 methylated primer S: 5' TCG AGA ACG CGA GCG ATT CG; AS: 5' GAC CAA TCC AAC CGA AAC GA

RAR $\beta$ 2 unmethylated primer S: 5' TTG AGA ATG TGA GTG ATT TG; AS: 5' AAC CAA TCC AAC CAA AAC AA

Below are the results for compounds (R)-**16A** and (R)-**16B**



**Msp RAR $\beta$**   
**HCT116 cell line**  
(*R*)-1A and (*R*)-1B 10 $\mu$ M  
5AZAdC 5 $\mu$ M

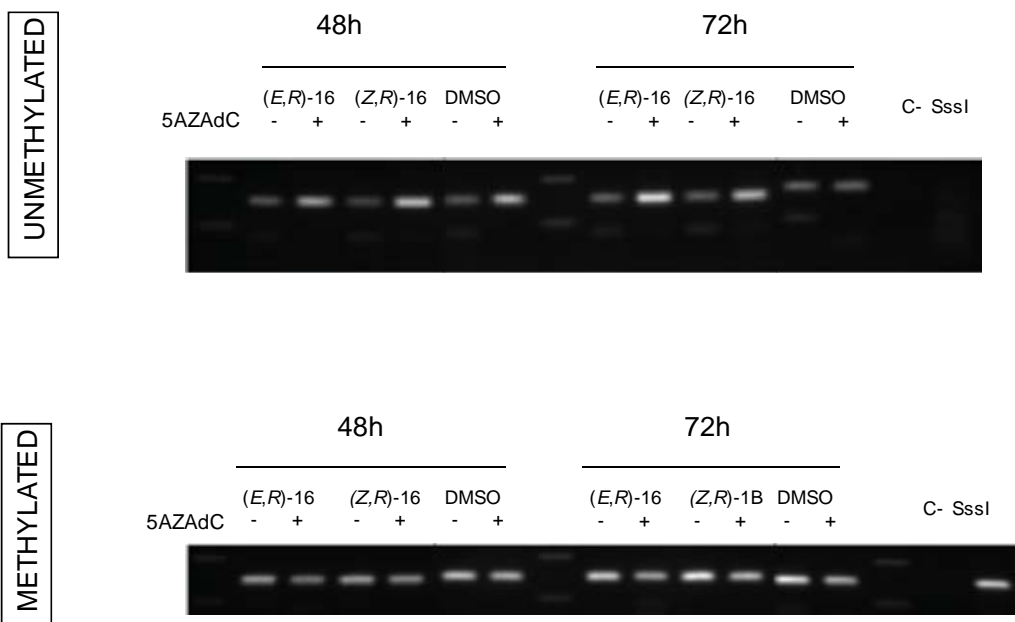

Supplement: c1ob05932g.pdf [file c1ob05932g.pdf]
